# Supplementary material for: Biochemical and growth responses of silver maple (Acer saccharinum L.) to sodium chloride and calcium chloride
Source: PeerJ. 2018 Dec 21;6:e5958. doi: 10.7717/peerj.5958 (PMC6309728; doi:10.7717/peerj.5958)
Supplement: Figure S1 — Each data point indicates value of relative growth rate [g g−1 FW d−1]. [file peerj-06-5958-s005.xlsx]

## Sheet: Figure 1 
	salt type: NaCl	raw values (RGR)
time [d]	salt dose [mM]	x1	x2	x3	x4
180	0	0.05	0.045	0.035	0.039
	10	0.043	0.041	0.039	0.04
	30	0.041	0.037	0.038	0.04
	60	0.031	0.032	0.027	0.026
	100	0.019	0.015	0.026	0.024
	120	0.021	0.02	0.019	0.02
360	0	0.033	0.032	0.031	0.031
	10	0.028	0.041	0.032	0.037
	30	0.029	0.03	0.026	0.027
	60	0.022	0.021	0.016	0.017
	100	0.015	0.003	0.005	0.012
	120	0.011	0.01	0.005	0.007
	salt type: CaCl2	raw values
time [d]	salt dose [mM]	x1	x2	x3	x4
180	0	0.052	0.052	0.051	0.049
	6.7	0.058	0.057	0.048	0.05
	20	0.057	0.056	0.053	0.054
	40	0.043	0.044	0.047	0.046
	66	0.038	0.03	0.037	0.031
	80	0.02	0.022	0.03	0.028
360	0	0.038	0.038	0.036	0.036
	6.7	0.029	0.032	0.047	0.045
	20	0.046	0.044	0.032	0.034
	40	0.029	0.026	0.025	0.028
	66	0.027	0.029	0.013	0.015
	80	0.018	0.022	0.019	0.021
