# Supplementary material for: Biochemical and growth responses of silver maple (Acer saccharinum L.) to sodium chloride and calcium chloride
Source: PeerJ. 2018 Dec 21;6:e5958. doi: 10.7717/peerj.5958 (PMC6309728; doi:10.7717/peerj.5958)
Supplement: Figure S2 — Each data point indicates chlorophyll content [mg g−1FW]. [file peerj-06-5958-s006.xlsx]

## Sheet: Figure 2
	salt type: NaCl	raw values (chl. A)					raw values (chl. B)
time [d]	salt dose [mM]	x1	x2	x3	x4		x1	x2	x3	x4
14	0	8.74	7.95	7.1	6.7		5.14	5.48	3.76	4.1
	10	6.85	8.74	6.32	8.12		3.3	3.8	5.12	4.62
	30	6.32	5.97	8.09	7.74		3.62	5.32	3.32	5.02
	60	7.06	7.32	4.95	5.22		4.9	3.45	2.84	4.29
	100	6.78	7.27	5.38	5.86		4.23	3.88	2.69	3.04
	120	6.25	4.15	5.95	4.45		4	2.9	4.43	2.62
28	0	9.76	7.32	6.89	9.33		4.9	6.48	5.7	4.12
	10	8.44	8.92	6.75	7.22		5.62	3.46	5.17	3.91
	30	7.99	7.55	5.69	6.12		4.8	5.12	3.22	3.54
	60	5.49	5.09	7.49	7.09		4.91	4.4	3.09	3.6
	100	4.55	6.9	6.35	5.05		2.78	5	4.66	3.14
	120	7.28	5.15	4.45	6.59		3.88	3.01	2.42	3.29
360	0	12.94	9.68	10.68	11.94		6.4	4.33	5.84	4.88
	10	12.75	13.25	9.87	10.37		5.17	6.69	5.35	6.51
	30	14.58	9.14	12.88	10.84		5.26	4.67	6.21	5.93
	60	10.09	15.04	14.01	11.13		5.33	5.77	4.46	4.91
	100	12.64	12.05	9.44	10.03		6.22	5.97	4.47	4.7
	120	12.66	9.45	11.01	8.6		5.75	5.39	4.31	4.67
	salt type: CaCl2
time [d]	salt dose [mM]
14	0	6.36	8.92	6.92	8.4		3.66	4.42	5.98	5.22
	6.7	8.04	7.75	5.91	6.06		5.73	5.45	4.23	4.51
	20	8.84	8.34	6.27	6.78		3.67	5.47	4.15	4.99
	40	5.86	5.35	8.13	7.62		4.92	4.71	3.7	3.91
	66	8.05	8.68	5.96	6.59		4.95	3.45	4.65	3.77
	80	8.56	5.86	6.44	7.98		4.64	4.24	3.46	3.86
28	0	7.23	7.87	9.49	8.85		4.73	6.55	5.22	6.06
	6.7	9.85	9.12	8.11	7.76		6.22	5.82	4.66	5.06
	20	10.15	9.52	7.83	8.46		6.14	4.8	6.67	5.39
	40	8.98	8.44	7.04	7.58		6.14	5.65	4.3	4.79
	66	6.61	8.69	7.1	8.2		3.46	5	3.82	4.64
	80	8.43	8.02	6.47	6.88		3.8	3.17	5.07	4.44
360	0	13.26	12.44	10.48	11.3		6.82	6.15	4.62	5.21
	6.7	13.02	13.4	10.76	11.14		6.85	4.79	5.53	6.11
	20	12.84	10.12	11.79	10.61		4.59	6.65	5.35	5.89
	40	12.64	13.08	10.74	11.7		6.54	5.93	4.37	4.96
	66	14.06	11.49	11.82	13.23		5.34	6.75	4.87	6.2
	80	11.48	13.58	13	10.9		6.45	5.98	4.6	5.05
