# Supplementary material for: Biochemical and growth responses of silver maple (Acer saccharinum L.) to sodium chloride and calcium chloride
Source: PeerJ. 2018 Dec 21;6:e5958. doi: 10.7717/peerj.5958 (PMC6309728; doi:10.7717/peerj.5958)
Supplement: Figure S3 — Each data point indicates proline content [mg g−1 FW). [file peerj-06-5958-s007.xlsx]

## Sheet: Figure 3
	salt type: NaCl	raw values (proline roots)					raw values (proline leaves)
time [d]	salt dose [mM]	x1	x2	x3	x4		x1	x2	x3	x4
14	0	16.15	15.9	17.6	17.1		27.9	26.1	28.9	25.4
	10	21.1	18.3	19	20.4		30.5	29.7	27.7	26.9
	30	28.6	26.4	28.1	26.9		30.1	35.9	34.5	31.5
	60	34.1	33.4	32	31.3		52.6	45.6	51.1	47.1
	100	37.9	37.6	36.9	36.5		69.4	62	68.7	62.7
	120	47.1	46.2	44.2	43.3		84.4	89.6	88.6	83.2
28	0	18.7	16.1	16.5	18.4		35.5	32.5	35	33
	10	21.6	19.4	21.6	19.6		37.2	36.8	32.2	33.5
	30	24.8	26.9	27.2	25.1		42.7	35.9	34.7	41.35
	60	28.7	31.5	31.1	29.1		42.3	40.8	52.2	50.2
	100	38.3	41.7	41.2	38.7		65.1	58.4	57.3	64
	120	55.2	57.6	57	54.8		78.5	81.5	94.3	89.7
360	0	26.8	26.5	25.2	25.6		59.6	55.8	56.5	58.8
	10	24.5	24	27.2	26.7		61.7	70.3	69	63
	30	26.6	29.5	28.6	25.7		88.9	78.5	80	87.4
	60	29.8	27.5	27.9	28.9		106.1	109.2	93.9	97.6
	100	34	32.5	33.6	32.2		118.8	134.2	132.1	120.7
	120	36.6	33.4	34.2	35.8		123.2	130.6	126.8	129
	salt type: CaCl2
time [d]	salt dose [mM]
14	0	12.1	12.5	14.1	13.7		22.8	23.2	25.6	25.2
	6.7	13.1	12.8	14.4	14.1		31.7	31	28	27.3
	20	15.3	14.6	16.5	17.2		37	35.9	37.6	36.2
	40	17.2	17.8	15.8	16.3		40.5	45.4	38.7	43.6
	66	26.6	28	20.5	21.7		47.9	46.9	42.3	43.2
	80	29.4	24	25.4	28		47	45.5	50.5	49
28	0	17.5	13.8	14.8	16.6		36	35.3	33.4	34.1
	6.7	19.1	18.5	16.9	17.6		34.4	41	42.4	33
	20	24.2	26	23.8	25.6		42.7	38.3	39	42
	40	29	27.3	27.8	28.8		52.4	54.8	43.5	46
	66	30.8	30.3	32.6	32.2		61.6	56.8	58	60.2
	80	47.5	43.5	42.9	46.9		75	78.9	63.1	67
360	0	24.8	24	22	22.5		56.5	58	63.8	61.5
	6.7	24.8	25.5	22.5	23.2		62.9	64.5	73.9	71.4
	20	25.7	24.9	25.4	25		67.4	75.3	65.1	73
	40	28.4	28	26	26.4		79.3	74.1	75.1	78.3
	66	26.8	28.6	28.2	27.2		83.2	82.3	89.1	88.1
	80	32	30	30.4	31.6		98.7	98	94.3	95
