# Supplementary material for: Biochemical and growth responses of silver maple (Acer saccharinum L.) to sodium chloride and calcium chloride
Source: PeerJ. 2018 Dec 21;6:e5958. doi: 10.7717/peerj.5958 (PMC6309728; doi:10.7717/peerj.5958)
Supplement: Figure S4 — Each data point indicates enzymatic activity [U min−1mg protein−1]. [file peerj-06-5958-s008.xlsx]

## Sheet: Figure 4
	salt type: NaCl	raw values (SOD roots)					raw values (SOD leaves)
time [d]	salt dose [mM]	x1	x2	x3	x4		x1	x2	x3	x4
14	0	23.1	25	24.3	22.4		16.9	16.6	16	15.7
	10	25.1	24.5	23.3	22.7		17.7	19.1	16.5	15.1
	30	23.9	23.6	24.4	24.1		17.1	16.7	18.1	17.7
	60	26.8	25.5	27.3	24.8		20.7	23.8	23	21.2
	100	24.8	27	27.6	25.7		25.6	23.9	26.3	24.6
	120	27.1	25.7	26.2	26.6		26.5	27.7	23.3	24.5
28	0	24.6	25.7	22.8	21.7		15.3	18.3	17.4	14.7
	10	22.6	24.5	25.2	23.3		16.7	17.1	15.9	16.3
	30	24.6	24.3	23.9	23.7		18.6	17.2	18.1	17.7
	60	26.5	25.6	27.5	24.7		24.4	24.8	23	23.4
	100	24.5	27.5	26.4	25.6		23.9	26.3	25.6	24.6
	120	25.9	24.6	25.3	26.6		27.7	26.5	24.5	23.3
360	0	16.4	16.7	15.6	15.3		16.5	14.1	14.8	15.8
	10	17.2	16.7	15.2	15.7		14.9	16.8	14.2	16.1
	30	16.7	15.9	17.2	15.4		18.2	17.5	16.4	17.1
	60	17.7	18.5	18.1	17.3		18.3	18.9	16.7	17.3
	100	19.5	17.3	17.9	18.9		17.6	16.9	15	15.7
	120	20.6	19	21.2	18.4		17.4	14.6	18.2	15.4
	salt type: CaCl2
time [d]	salt dose [mM]
14	0	22.7	22	21	20.3		17.9	17.4	16.8	16.3
	6.7	24.4	23.8	22.4	21.8		20.4	19.6	17.9	18.6
	20	24.4	27.5	23.3	26.4		20.8	19.4	19.8	20.4
	40	25.3	28.5	27.9	25.9		20.6	20.3	19.8	20.1
	66	27	26.4	24.8	25.4		20	21.8	20.4	21.4
	80	25.8	25.4	25	24.6		21.3	23.1	23	21.7
28	0	21.9	20.7	22.5	20.1		14.8	13.9	15.2	13.7
	6.7	22	23.8	21.1	23		17.7	15.3	16	17
	20	27.5	26.4	24.4	23.4		21	20.6	19.2	19.6
	40	25.9	25.5	28.3	27.9		20.6	20.4	20	19.8
	66	24.7	27.3	26.5	25.3		20	21.8	20.5	21.3
	80	24.5	25.8	25.4	25		23.3	22.8	21.3	21.8
360	0	16.9	16.8	16.3	16.4		16.4	15.8	14.2	13.6
	6.7	17.8	17.5	16.4	16.7		16.3	14.1	14.7	15.7
	20	17.2	17.4	17.9	18.4		15.2	17	15.8	16.4
	40	18.9	18.7	18.5	18.3		16.9	15.5	15.8	16.6
	66	17.9	15.7	17.2	16		15.7	16	14.4	14.8
	80	15.8	16.9	16.1	16.5		16.2	17.7	17.2	15.7
