# Supplementary material for: Biochemical and growth responses of silver maple (Acer saccharinum L.) to sodium chloride and calcium chloride
Source: PeerJ. 2018 Dec 21;6:e5958. doi: 10.7717/peerj.5958 (PMC6309728; doi:10.7717/peerj.5958)
Supplement: Figure S5 — Each data point indicates enzymatic activity [U min−1mg protein−1]. [file peerj-06-5958-s009.xlsx]

## Sheet: Figure 5
	salt type: NaCl	raw values (CAT roots)					raw values (CAT leaves)
time [d]	salt dose [mM]	x1	x2	x3	x4		x1	x2	x3	x4
14	0	4.6	4.65	4.8	4.65		5.3	5.7	5.6	5.4
	10	5.1	5.15	5.25	5.3		5.4	5.2	5.3	5.3
	30	8.1	8.3	8.9	9.1		5	4.9	4.6	4.7
	60	11.4	10	10.2	11.2		4.3	4.8	4.9	4.4
	100	5.9	6.5	8.1	7.5		4.8	5.4	5.3	4.9
	120	6.5	5.3	5.9	4.7		4.9	5	5.3	5.2
28	0	4.1	4.6	4	4.5		5.3	5.6	5.7	5.4
	10	7.3	8.5	8.7	7.5		5.4	5.2	5.25	5.35
	30	10.5	9.2	13.6	12.3		5	4.9	4.7	4.6
	60	11.6	14.2	10.4	15.4		4.9	4.3	4.4	4.8
	100	14.8	13.7	17.5	16.4		5.2	5.5	4.8	5
	120	17	16.7	15	15.3		4.9	5.3	5.2	5
360	0	6	5.8	5.6	5.4		4.2	5	4.8	4.4
	10	6.5	6.7	5.3	5.5		6.3	5.5	5.7	6.5
	30	6	6.2	7	6.8		5.5	6.7	5.1	6.3
	60	8.05	8.1	7.9	7.95		5.6	6.2	6	5.4
	100	8.5	8.2	9.2	8.9		6.3	5.1	4.7	5.9
	120	8.7	8.2	10.2	9.7		6.5	5.5	6.9	5.9
	salt type: CaCl2
time [d]	salt dose [mM]
14	0	4.4	4.6	4.45	4.55		5.1	5.7	5.5	5.3
	6.7	4.1	4.7	4.3	4.5		5.1	5.2	4.8	4.9
	20	5.3	5.2	5.1	5.2		3.9	4.1	4.7	4.5
	40	5.3	5.5	6.3	6.1		4.1	4	3.7	3.8
	66	6.5	6.9	6.3	6.7		3.4	4.2	4	3.2
	80	5.5	6.9	5.9	6.5		3.7	3.9	3.3	3.5
28	0	3.8	3.9	4.1	4.2		5.6	5.7	5.1	5.2
	6.7	4.8	5.2	4.6	5		4.8	5	5.2	5
	20	6.1	5.3	6	5.4		3.9	4.7	4.1	4.5
	40	7.2	7.4	7	6.8		4.1	4	3.7	3.8
	66	6.7	7.5	7.3	6.9		3.2	3.5	4.2	3.9
	80	6.6	6.9	6.8	6.5		3.9	3.7	3.5	3.3
360	0	4.7	4.9	5.3	5.5		4.3	4.5	3.5	3.8
	6.7	6.2	6.5	5.5	5.8		4.6	5.6	5.3	4.9
	20	6.3	6.7	6.5	6.1		4.6	4.5	4.2	4.3
	40	6	6.2	6.6	6.8		5.1	4.7	5.4	4.4
	66	5.9	6.9	6.5	5.5		5.1	4.8	5.2	4.9
	80	7.1	5.5	6.7	6		5.3	5	5.1	5.4
