# Supplementary material for: Biochemical and growth responses of silver maple (Acer saccharinum L.) to sodium chloride and calcium chloride
Source: PeerJ. 2018 Dec 21;6:e5958. doi: 10.7717/peerj.5958 (PMC6309728; doi:10.7717/peerj.5958)
Supplement: Figure S6 — Each data point indicates enzymatic activity [U min−1 mg protein−1]. [file peerj-06-5958-s010.xlsx]

## Sheet: Figure 6
	salt type: NaCl	raw values (POD roots)					raw values (POD leaves)
time [d]	salt dose [mM]	x1	x2	x3	x4		x1	x2	x3	x4
14	0	14.9	16.4	13.5	12		32.7	36.2	40.5	46.6
	10	17.8	19.5	13.9	15.6		44.3	52.8	50.9	42.8
	30	24.7	23.2	17.5	19.2		63.3	59.8	72.5	69.2
	60	29.3	34.5	32.1	26.9		97	94.6	104	101.2
	100	51.5	55.1	63.5	59.9		80.6	86.8	101.4	95.2
	120	74.3	83	72.2	80.5		70.2	70.9	68.3	69
28	0	18.6	17.8	15.9	16.5		33.6	34.6	29	28
	10	20.2	21	16.2	17		34.6	36.3	30.3	32
	30	27.4	27.8	26	26.4		37	33.3	37.5	32.9
	60	27.4	30	28	30.6		32.5	38.9	40.9	30.5
	100	32	30.8	36.2	35		33.9	40.2	36.2	42.5
	120	35.3	36.7	30.7	32.1		40	41.9	36.2	38
360	0	9.7	10.9	5.3	6.5		26	26.6	23.4	24
	10	12.4	9.8	13.6	11		28	23.8	29.2	25
	30	16.6	15.4	14.8	17.4		26.8	30.4	29.2	25.6
	60	24.4	25.1	20.6	19.9		29.3	28.4	26.1	27
	100	27.6	26.6	21.8	22.8		24.8	25.2	26.6	26
	120	24.4	29.9	28.6	23.1		26.6	28.7	25.7	28
	salt type: CaCl2
time [d]	salt dose [mM]
14	0	12.6	18.1	16.2	11		35.8	29.7	31.2	34.2
	6.7	15	13	16.3	11.7		38.1	40.4	33	34.6
	20	12.6	16.8	15.8	11.5		34.4	40.9	36.2	39.2
	40	18.7	13.3	14	17.9		44.9	43.3	48.7	47.1
	66	19.7	18.5	14.8	15.9		50.3	49.1	45.1	46.3
	80	26.4	25.3	31.1	30.1		65.6	63.5	52.7	54.9
28	0	17.1	17.6	14	14.5		27.8	37.2	34.8	30.2
	6.7	13.3	12.2	17.1	15.9		35.3	34	29.7	31
	20	16.5	10.9	15.2	12.2		40.5	45.6	44.4	38.4
	40	21.2	20	15.8	17		38.5	42.9	43.4	39.1
	66	15.7	21.5	20.1	17.1		43.9	42.8	38.5	39.6
	80	19.4	22.7	22	20		43.5	40.4	49.6	46.5
360	0	11.3	10.3	8.1	9.1		31.7	32.8	26.2	27.3
	6.7	15	11	12	14		28.8	32	31.2	28.1
	20	16.1	17.5	13.2	14.5		26.6	25.4	31.5	30.4
	40	13.4	15	15.7	12.6		31.6	26.9	28	30.4
	66	26.3	23	23.2	25.4		29.7	32.5	31.3	28.5
	80	27.7	26.2	23.7	25.2		34.1	32.2	26.3	28.2
