# Supplementary material for: Biochemical and growth responses of silver maple (Acer saccharinum L.) to sodium chloride and calcium chloride
Source: PubMed Central journal article supplement (PMC6309728; doi:10.7717/peerj.5958), 2018-12-21
Supplement: peerj-06-5958-s004.pdf [file peerj-06-5958-s004.pdf]

**Supplemental Table 4. Results of three-way ANOVA examining the effects of the studied factors on biochemical parameters in roots of silver maple (*Acer saccharinum* L.). n.s. – not significant**

| Parameter | Factor    | df | F     | p      |
|-----------|-----------|----|-------|--------|
| Proline   | T         | 2  | 213.7 | <0.001 |
|           | S         | 1  | 592.7 | <0.001 |
|           | C         | 5  | 583.7 | <0.001 |
|           | T x S     | 2  | 147.5 | <0.001 |
|           | T x C     | 10 | 57.5  | <0.001 |
|           | S x C     | 5  | 5.4   | <0.001 |
|           | T x S x C | 10 | 6.6   | <0.001 |
| SOD       | T         | 2  | 947.7 | <0.001 |
|           | S         | 1  | 4.2   | 0.05   |
|           | C         | 5  | 35.9  | <0.001 |
|           | T x S     | 2  | 0.1   | n.s.   |
|           | T x C     | 10 | 0.9   | n.s.   |
|           | S x C     | 5  | 8.5   | <0.001 |
|           | T x S x C | 10 | 4.0   | <0.001 |
| CAT       | T         | 2  | 117.6 | <0.001 |
|           | S         | 1  | 546.0 | <0.001 |
|           | C         | 5  | 175.6 | <0.001 |
|           | T x S     | 2  | 87.1  | <0.001 |
|           | T x C     | 10 | 24.9  | <0.001 |
|           | S x C     | 5  | 19.2  | <0.001 |
|           | T x S x C | 10 | 17.7  | <0.001 |
| POX       | T         | 2  | 67.0  | <0.001 |
|           | S         | 1  | 231.5 | <0.001 |
|           | C         | 5  | 164.6 | <0.001 |
|           | T x S     | 2  | 49.8  | <0.001 |
|           | T x C     | 10 | 11.9  | <0.001 |
|           | S x C     | 5  | 21.7  | <0.001 |
|           | T x S x C | 10 | 6.8   | <0.001 |
| Protein   | T         | 2  | 37.6  | <0.001 |
|           | S         | 1  | 7.6   | 0.01   |
|           | C         | 5  | 35.5  | <0.001 |
|           | T x S     | 2  | 80.5  | <0.001 |
|           | T x C     | 10 | 6.5   | <0.001 |
|           | S x C     | 5  | 9.9   | <0.001 |
|           | T x S x C | 10 | 9.2   | <0.001 |
