# Supplementary material for: Biochemical and growth responses of silver maple (Acer saccharinum L.) to sodium chloride and calcium chloride
Source: PeerJ. 2018 Dec 21;6:e5958. doi: 10.7717/peerj.5958 (PMC6309728; doi:10.7717/peerj.5958)
Supplement: Table S1 — Values are mean ± SD (n = 4). Different lower-case letters indicate significant differences by ANOVA followed by Tukey’s test at P < 0.05. [file peerj-06-5958-s001.docx]

**Supplemental table 1 Effects of saline stress on the protein content in the roots and leaves from the silver maple seedlings exposed to different salinity levels (NaCl or CaCl2) after 14, 28 and 360 days [mg g-1 FW].** Values are mean ± SD (n = 4). Different lower-case letters indicate significant differences by ANOVA followed by Tukey's test at P < 0.05.

| Salinity (mM) | 14 days | 28 days | 360 days |
| --- | --- | --- | --- |
| roots | | | |
| 0 NaCl | 4.4 ± 0.1ab | 4.4 ± 0.1d | 4.7 ± 0.2c |
| 10 NaCl | 4.7 ± 0.3ab | 5.0 ± 0.1c | 5.0 ± 0.3bc |
| 30 NaCl | 5.2 ± 0.5ab | 5.9 ± 0.2b | 5.3 ± 0.2ab |
| 60 NaCl | 5.3 ± 0.4a | 7.7 ± 0.8a | 5.5 ± 0.2ab |
| 100 NaCl | 4.2 ± 0.5ab | 6.3 ± 0.4b | 5.1 ± 0.3bc |
| 120 NaCl | 3.7 ± 0.7b | 6.1 ± 0.1b | 5.8 ± 0.3a |
|  |  |  |  |
| 0 CaCl2 | 4.8 ± 0.3b | 4.9 ± 0.4d | 4.4 ± 0.2b |
| 6.7 CaCl2 | 5.1 ± 0.2b | 4.9 ± 0.1cd | 4.8 ± 0.4ab |
| 20 CaCl2 | 6.0 ± 0.5a | 5.4 ± 0.1bcd | 4.8 ± 0.3ab |
| 40 CaCl2 | 6.1 ± 0.3a | 5.5 ± 0.4bc | 5.0 ± 0.5ab |
| 66 CaCl2 | 6.2 ± 0.6a | 5.7 ± 0.3b | 5.2 ± 0.4ab |
| 80 CaCl2 | 6.4 ± 0.4a | 6.4 ± 0.3a | 5.0 ± 0.3a |
| leaves | | | |
| 0 NaCl | 12.2 ± 0.7ab | 11.6 ± 0.7c | 14.4 ± 0.6a |
| 10 NaCl | 12.9 ± 0.8a | 12.4 ± 0.9bc | 14.5 ± 0.9a |
| 30 NaCl | 13.4 ± 0.6a | 14.7 ± 0.9a | 14.6 ± 0.8a |
| 60 NaCl | 11.0 ± 0.8bc | 14.2 ± 0.6ab | 14.8 ± 0.4a |
| 100 NaCl | 9.7 ± 0.7cd | 13.9 ± 0.9ab | 14.6 ± 1.1a |
| 120 NaCl | 9.1 ± 0.6d | 14.1 ± 1.1ab | 14.8 ± 0.6a |
|  |  |  |  |
| 0 CaCl2 | 12.5 ± 0.8d | 13.9 ± 1.0c | 13.7 ± 0.5b |
| 6.7 CaCl2 | 12.9 ± 0.9cd | 15.5 ± 0.2b | 14.0 ± 0.9b |
| 20 CaCl2 | 14.2 ± 0.9bc | 16.2 ± 0.4ab | 16.1 ± 0.5a |
| 40 CaCl2 | 15.2 ± 0.7ab | 15.9 ± 0.7ab | 16.5 ± 0.6a |
| 66 CaCl2 | 16.0 ± 0.4a | 16.9 ± 0.3a | 16.1 ± 0.6a |
| 80 CaCl2 | 16.2 ± 0.6a | 16.9 ± 0.4a | 17.0 ± 0.4a |
