# Supplementary material for: Biochemical and growth responses of silver maple (Acer saccharinum L.) to sodium chloride and calcium chloride
Source: PeerJ. 2018 Dec 21;6:e5958. doi: 10.7717/peerj.5958 (PMC6309728; doi:10.7717/peerj.5958)
Supplement: Table S5 — Each data point indicates value of selected weight parameter [mg plant−1]. [file peerj-06-5958-s011.xlsx]

## Sheet: Table 1
	salt type: NaCl	raw values (FW roots)					raw values (FW shoots)					raw values (FW total)					raw values (DW roots)					raw values (DW shoots)					raw values (DW total)
time [d]	salt dose [mM]	x1	x2	x3	x4		x1	x2	x3	x4		x1	x2	x3	x4		x1	x2	x3	x4		x1	x2	x3	x4		x1	x2	x3	x4
180	0	493.9	489	467.2	472.2		322.2	316.1	298.2	304.3		803.6	798	778	783.6		64.8	63.3	60.6	62.1		223.9	205.1	220	209		286.8	282.5	267.7	271.9
	10	475.9	473.4	458.9	459.8		311.8	299.6	308	303.4		796.3	783	748.3	761.6		66.5	62.7	54.4	57.6		239.3	233.3	214.7	220.7		291.4	293	281.6	283.2
	30	325.5	328.2	315.9	320		269.9	262.4	247.7	253.6		600.4	586.2	561.2	575.4		61.4	58.2	50.8	54		196.6	192	181.2	185.8		243.3	253.1	249.1	234.5
	60	316.9	314.2	301.3	304		250.3	248	235.1	237.4		567	555.6	536.6	548		64.6	62.5	47.2	49.3		160	157.2	149.3	153.5		215.9	212.2	205.9	209.6
	100	257.7	251.5	231.3	237.5		239	232.2	212.4	219.2		480.7	473	459.7	467.4		54.4	53.3	48.6	49.7		128.9	126	117.5	120.4		178.6	175.5	170.8	173.9
	120	211.5	225	232.8	198.7		202.8	201	191.2	193		424.9	419	403.1	409		53.6	38.4	44.8	47.2		107.4	104	94	97.4		151.4	148.5	142.2	144.7
360	0	566.8	562.7	540.8	544.9		682.2	676.4	659.2	665.7		1250.3	1231.3	1199.1	1218.1		90.9	89	81.8	83.8		414.8	400.1	403.8	409.7		504.4	498.3	484	487.4
	10	583.1	577.6	563.2	568.8		748.2	804.6	783	749.8		1368.7	1319.9	1326	1363.8		87.9	83.5	74.8	79.8		455.1	451	440.9	445		536.9	533.3	522.1	525.7
	30	418.8	415.3	406.4	409.9		626.7	617.8	586.3	599.2		1041.6	999.5	1031.4	1008		79.1	73.6	62.6	68		356.9	331.8	351.8	337.6		420.8	409.7	411.2	419.4
	60	388.5	381.9	370.6	377.1		478.7	472.6	447.6	453.6		855.3	851.2	830	833.9		74.8	72.2	63.3	65.8		235.7	232	222.5	226.2		293.6	302.4	301	295.4
	100	290	282.3	262.6	270.3		416	410.2	380.6	386.2		685.9	680.9	663.5	668		62.6	64.6	51.4	53.4		153.9	150.5	137.1	140.5		209.9	205.1	198	200.9
	120	260.2	250.2	226.2	236.2		408.2	403.4	381	385.8		647.8	644.2	627	632.2		54.1	51.9	43.9	46.1		130.8	128.6	113.4	115.6		175	172.5	167.2	169.7
	salt type: CaCl2
time [d]	salt dose [mM]
180	0	541.8	539	531.6	533.4		428.8	421.6	399.4	406.6		964.7	958	936.8	943.6		92.8	90.2	81.6	84.2		279.9	274.2	264.9	270.6		366.2	352.3	358.9	360.9
	6.7	572.8	569.8	559.1	561.9		424.5	417	408.5	416		1004.1	998	960.7	966.8		110	104.2	96.3	102		289.4	283	271.6	278		390.9	386.4	376.6	380.5
	20	604.9	599.8	588.6	592.2		456	451.2	438.4	443.2		1070.4	1052.8	1016.6	1034.2		112.1	110	105.7	107.8		247.1	241.5	232.1	225.7		339.5	354.4	351.3	336.8
	40	508.9	509.8	491.3	486		398.5	388.9	372.1	381.7		903.5	870	885.1	878.6		90.1	85.1	73.1	78.1		203.8	201.8	190.2	192.2		286.2	273.2	271	284.1
	66	467.1	462.6	452.4	448.7		368.4	360.2	348.8	357		832.7	826.8	799.8	805.8		77.9	74.2	67.2	70.8		159.6	156.2	145.8	149.2		229.7	226.2	221.7	223.2
	80	421.4	407	403.5	418		344.7	339	328.6	334.4		763.1	752.4	735.3	736		64.5	62.4	54.8	56.8		140.9	138	128.5	131.8		198.1	188.8	193.4	197.1
360	0	542.4	538	531	535.4		666.4	679.9	600.5	589.2		1198.7	1142.7	1188.5	1152.9		131.8	127	118.4	121.6		598.1	563.1	567.7	594.3		714.7	711.2	696.2	699.8
	6.7	873.6	868.4	858.5	863.2		1406.6	1399.9	1360.2	1366.9		2270.9	2226.6	2235.6	2264		144.6	147.1	133.3	138.6		633.5	623.8	605.1	599.6		746.6	765.2	749.8	764
	20	660.3	656.3	644.2	648.1		912.2	908	881.8	885.9		1564.2	1558.2	1540.2	1526.1		181.1	176	164.9	169.7		518.4	551	513	537.5		710.3	708.6	695.9	696.7
	40	600.5	596.2	575.5	579.8		611.7	606.6	581.4	586.3		1199.5	1169.7	1188.3	1180.5		116.8	112	102.1	106.8		358.9	353	333.1	339		462	459.7	448.8	451.1
	66	485.6	483.5	468.7	471		547.5	539.2	503.6	511.8		1016.2	989.3	1010	995.4		96.9	94.9	87.6	90.1		243.9	243	236.3	237.2		339.3	327.7	336.4	330.6
	80	481.9	471.2	449.5	457.4		485.6	476	460.8	470.4		946.6	944.3	927.4	934.5		77.5	75.8	69.5	71.2		219.9	216.8	207.1	210.2		292.1	283.1	285.5	287.2
