# Supplementary material for: Biochemical and growth responses of silver maple (Acer saccharinum L.) to sodium chloride and calcium chloride
Source: PeerJ. 2018 Dec 21;6:e5958. doi: 10.7717/peerj.5958 (PMC6309728; doi:10.7717/peerj.5958)
Supplement: Table S6 — Each data point indicates protein content [mg g−1FW]. [file peerj-06-5958-s012.xlsx]

## Sheet: Protein
	salt type: NaCl	raw values (protein roots)					raw values (protein leaves)
time [d]	salt dose [mM]	x1	x2	x3	x4		x1	x2	x3	x4
14	0	4.3	4.55	4.45	4.35		11.4	12	13	12.4
	10	4.5	4.3	5	4.8		12.4	12.1	13.4	13.7
	30	5.6	4.7	5.7	4.8		13	13.8	14	12.8
	60	5.7	5.1	5.5	4.9		10.6	10.1	11.9	11.4
	100	3.9	3.7	4.7	4.4		10.5	9.4	8.9	10
	120	3.9	4.5	2.9	3.4		8.6	9.8	9.4	8.7
28	0	4.4	4.3	4.45	4.35		10.9	12.3	12	11.2
	10	4.95	4.9	5.1	5.05		11.4	11.9	13.4	12.7
	30	6	6.1	5.7	5.8		14.6	15.9	13.6	14.8
	60	7.3	6.8	8.1	8.6		14.6	13.8	14.8	13.6
	100	5.9	6.6	6.7	6		14.4	14.9	13	13.4
	120	6.2	6	6.15	6.05		12.9	13.5	14.7	15.3
360	0	4.6	4.5	4.8	4.9		14	13.8	15	14.8
	10	4.7	4.8	5.2	5.3		15.5	14	13.6	15
	30	5.2	5.1	5.5	5.4		15	15.5	13.8	14.2
	60	5.3	5.4	5.6	5.7		15.1	14.4	15.2	14.5
	100	5	5.5	4.8	5.2		13.3	15.9	15	14.2
	120	6.2	5.7	5.5	5.9		14.6	14.1	15.5	15
	salt type: CaCl2
time [d]	salt dose [mM]
14	0	4.5	5	5.1	4.6		11.7	13.3	13	12
	6.7	5.3	4.9	5	5.2		11.9	13.4	12.4	13.9
	20	6.2	6.6	5.4	5.8		13.3	14.8	15.1	13.6
	40	5.9	5.8	6.3	6.4		15.5	16	14.4	14.9
	66	6.5	6.8	5.5	5.9		16.4	15.6	15.8	16.2
	80	6.2	6.6	6	6.8		15.8	16.8	16.6	15.6
28	0	4.5	4.7	5.1	5.3		12.8	15	13.4	14.4
	6.7	4.95	5	4.8	4.85		15.3	15.4	15.6	15.7
	20	5.5	5.3	5.35	5.45		15.8	16	16.6	16.4
	40	5.3	5.1	5.7	5.9		16.2	15.1	16.7	15.6
	66	6	5.5	5.4	5.8		16.5	16.8	17.2	17
	80	6.6	6	6.3	6.7		16.5	16.7	17.3	17.1
360	0	4.3	4.1	4.5	4.6		13.4	13.2	14.2	14
	6.7	5.2	4.6	4.4	5		13.6	13	15	14.4
	20	4.9	4.4	5.1	4.6		16.4	16.6	15.6	15.8
	40	4.7	5.5	4.5	5.3		15.8	16.3	16.7	17.2
	66	5.4	5.6	4.8	5		16.3	16.8	15.4	15.9
	80	4.8	4.7	5.3	5.1		16.8	16.6	17.4	17.2
